# Supplementary material
Source: publisher figshare collection journal article supplement (https://frontiersin.figshare.com/ndownloader/files/25685006)
Supplement: Supplementary file [file 25685006]

## *Supplementary Material*

**Supplementary Figure 1.** (A) Time courses for ROS production over 4 h. Patient and healthy participant neutrophils were pre-incubated with free radical sensor CM-H2DCFDA, and ROS production was measured every 30 min for 4 h in the presence and absence of PMA, mean with SEM shown. (B) Patient and healthy participant neutrophils ROS levels were measured without a stimulus. Statistical significance was analyzed by unpaired t-test, \*  $p < 0.05$ , mean with 95% confidence interval shown. (C) Neutrophils were stained with anti-histone 4-citrulline-3 antibody and anti-rabbit IgG, DyLight 594 conjugated secondary antibody.

**Supplementary Figure 2.** Time courses for ROS production over 4 h. Patient and healthy participant neutrophils were pre-incubated with free radical sensor CM-H2DCFDA, and ROS production was measured every 30 min for 4 h in the presence of *C. albicans* during planktonic or biofilm growth (A), or in the presence of *C. albicans* biofilm and/or PMA (B), mean with SEM shown.
